# Supplementary material
Source: PubMed Central journal article supplement (PMC7480368)
Supplement: AEM.01523-20-s0001.pdf [file AEM.01523-20-s0001.pdf]

## Supplementary Materials

**SufR, a [4Fe-4S] cluster-containing transcription factor, represses the *sufRBDCSU* operon in the iron-sulfur cluster assembly in *Streptomyces avermitilis***

Yaqing Cheng, Mengya Lyu, Renjun Yang, Ying Wen, Yuan Song, Jilun Li, & Zhi Chen\*

State Key Laboratory of Agrobiotechnology and Key Laboratory of Soil Microbiology,  
Ministry of Agriculture, College of Biological Sciences, China Agricultural University,  
Beijing 100193, China

\*For correspondence. E-mail [chenzhi@cau.edu.cn](mailto:chenzhi@cau.edu.cn); Tel. (+86)1062732715.

Running title: Characterization of SufR in *Streptomyces avermitilis*

Keywords: Fe-S cluster homeostasis, SufR, [4Fe-4S] cluster, *suf* operon, *S. avermitilis*

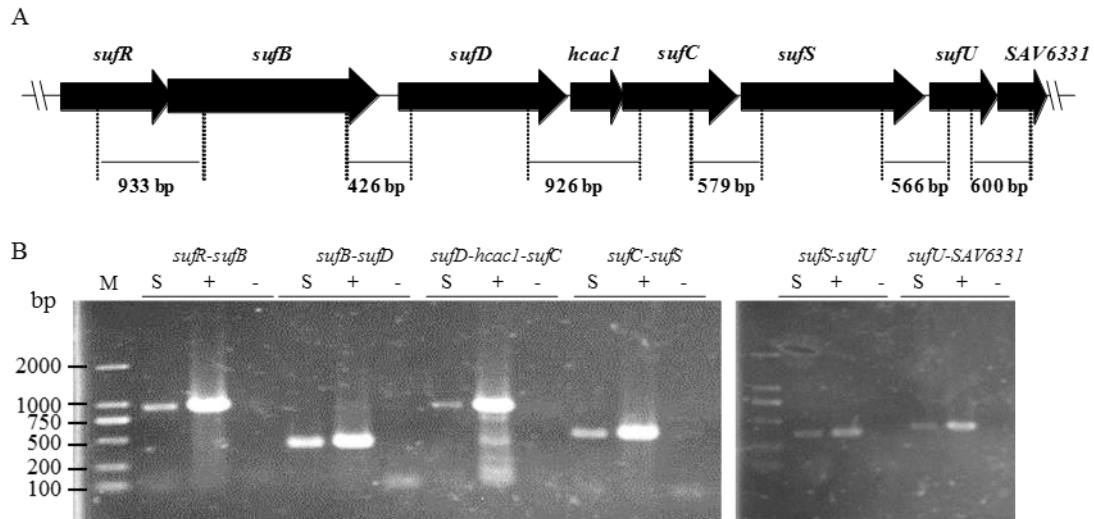

**Figure S1 RT-PCR analysis of the *suf* operon in *S. avermitilis*.** (A) The gene organization of the *suf* operon. The position of the primers used for PCR amplification and the lengths of DNA fragments are shown. (B) PCR amplification of the *suf* genes. The cDNA obtained by reverse transcription of WT RNA was used as template in lanes S. Lanes + are positive controls using the WT DNA as template. Lanes - are the negative controls using water as template. Lane M, 1-kb DNA marker.

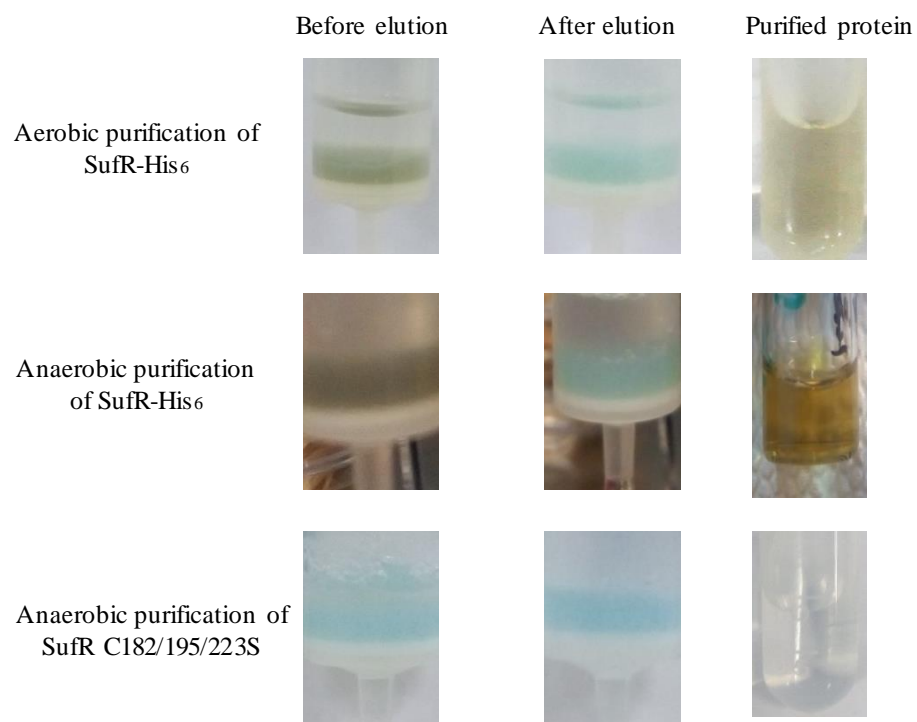

**Figure S2 The purification of SufR-His<sub>6</sub> and SufR C182/195/223S proteins under anaerobic or aerobic conditions.**

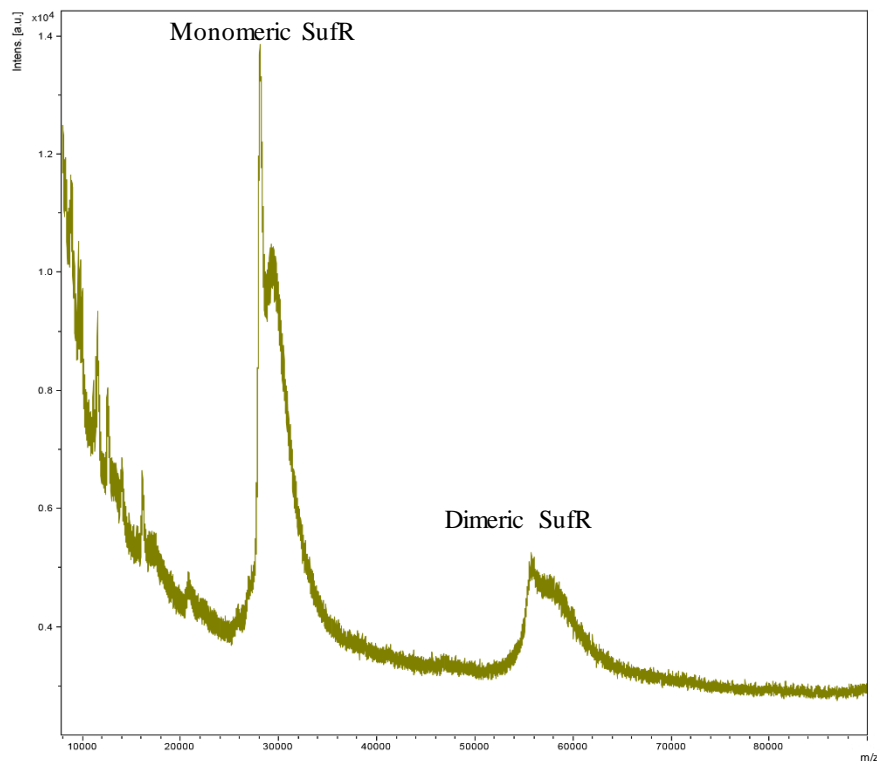

**Figure S3 MALDI-TOF analysis of anaerobically purified SufR-His<sub>6</sub>.** The observed mass peak is equal to the predicted mass of SufR.

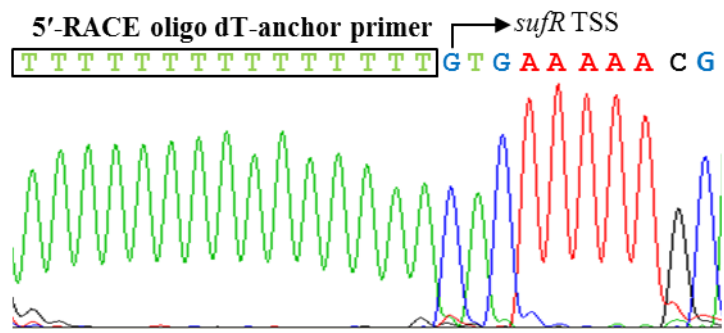

**Figure S4 Determination of the *sufR* TSS by 5'-RACE.** Boxed area: sequence of oligo dT-anchor primer. Bent arrow: *sufR* transcriptional start site.

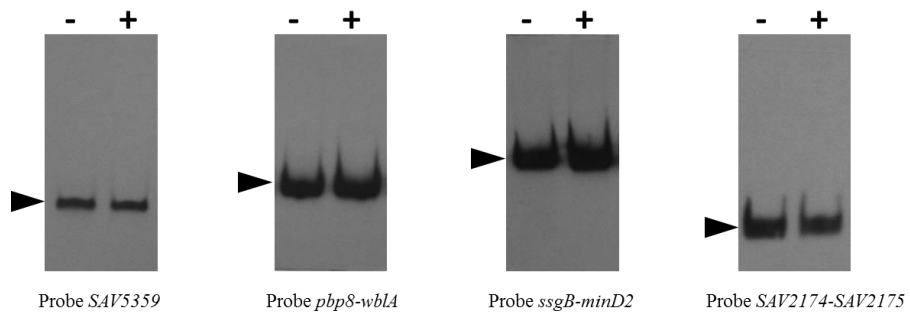

**Figure S5 Binding of SufR to promoter regions of putative SufR targets.** Concentrations of SufR for probes were 120 nM. Arrow: free probe.

|                       | -35                                                    | -10 |
|-----------------------|--------------------------------------------------------|-----|
| <i>S. avermitilis</i> | CGCGGGTTGTCAGGCCCTGAGGAATTACGCAACAATGGCGTT <b>GTG</b>  |     |
| <i>S. coelicolor</i>  | CGCGGGTTGCCCCCCCCGGAGGAATTACGCAACAATGGCGTT <b>GTG</b>  |     |
| <i>S. griseus</i>     | CCGTGGTTGTCAGAGCCGAATGAATTACGCAACAATGGTGTT <b>GTG</b>  |     |
| <i>S. venezuelae</i>  | CGGCGCTTGTCAAGCCGAGATTAATTACGCAACAATGGCGTT <b>GTG</b>  |     |
| <i>S. scabies</i>     | CGCGGCTTGCCCCCTCTCCGAGGAATTACGCAACAATGGCGTT <b>GTG</b> |     |

**Figure S6 Alignment of *sufR* promoter regions in *Streptomyces* species (taken from StrepDB), revealing a conserved SufR binding site. Boxes: putative -10 and -35 regions of promoters.**

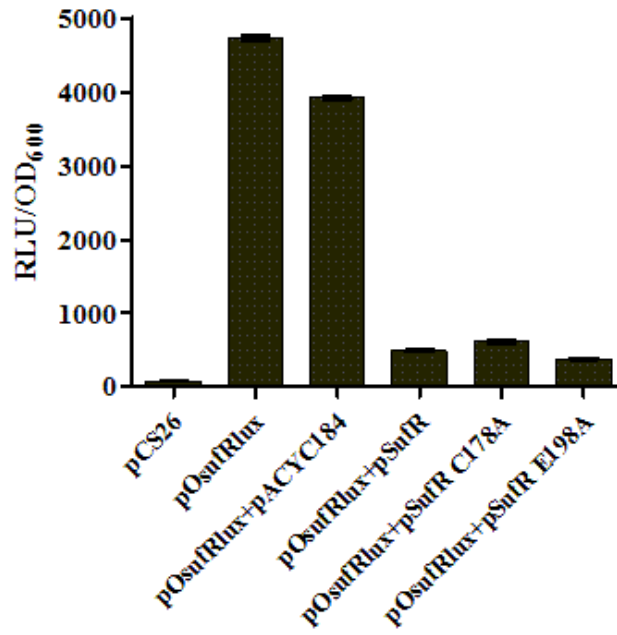

**Figure S7** The effect of SufRC178A and SufRE198A on bioluminescence level of *E. coli* containing reporter plasmid pOsufRlux. RLU (relative light units) represents bioluminescence level. Error bars: standard deviation of three technical replicates



|                                       |     |                                                                                         |                                                                                                                                                                                                                                                                                                                                   |       |
|---------------------------------------|-----|-----------------------------------------------------------------------------------------|-----------------------------------------------------------------------------------------------------------------------------------------------------------------------------------------------------------------------------------------------------------------------------------------------------------------------------------|-------|
| <i>Planktothrix agardhii</i>          | 80  | HVYELTTQGREHFFNR                                                                        | YDEF <b>A</b> ISFLD <b>T</b> L <b>T</b> Q <b>T</b> -WGHEQVSQILHQWQRKAIEYREKVGKGS-LKE-RVEKLVLRKT                                                                                                                                                                                                                                   | 153   |
| <i>Mycobacterium fortuitum</i>        | 76  | KRYRLTSA <b>G</b> RAKL <b>G</b> H <b>T</b>                                              | YDDLAVAAIRQLREI-GGKDAVRTFARRRMDTILAGVTEGSG---GVA <b>d</b> TAERVADALTR                                                                                                                                                                                                                                                             | 147   |
| <i>Synechococcus</i> sp.              | 66  | NIWRLTALGHQHFFDG [1]                                                                    | -ESFALGLLNSMAAT-LSP <b>E</b> AMASLLSQALEKASRYRQRVGS <b>G</b> P-LRE-RIATLAE <b>L</b> RRQ                                                                                                                                                                                                                                           | 139   |
| <i>Gloeotheca citriformis</i>         | 66  | YVYGLSRQGRERYPHR                                                                        | YGEF <b>A</b> VSFLD <b>T</b> L <b>V</b> ET-WGEKQWGEVLRHQWQRKAKEYRDRIGVGS-LKE-RVAKLVQLRQE                                                                                                                                                                                                                                          | 139   |
| <i>Rippkaea orientalis</i>            | 66  | YL <b>Y</b> HL <b>S</b> KQGRDRFFNR                                                      | YGEF <b>A</b> VSFLD <b>L</b> TA <b>E</b> T-WGKHQVTEVLRHQWQRKAKEYRQNI <b>G</b> EGT-LKE-RVDRLVKL <b>R</b> QE                                                                                                                                                                                                                        | 139   |
| <i>Crocospaera subtropica</i>         | 66  | YIYSLKQGRDRFFNQ                                                                         | YGEF <b>A</b> VSFLD <b>L</b> T <b>E</b> T-MG <b>S</b> QVKEVLRHQWQRKAD <b>D</b> YRQ <b>I</b> GKGS-LKE-RVERLVKL <b>R</b> QE                                                                                                                                                                                                         | 139   |
| <i>Mycobacterium tuberculosis</i>     | 57  | KRYRLTA <b>G</b> RAKL <b>D</b> H <b>S</b>                                               | YDDL <b>A</b> SAAMRQLREI-GG <b>E</b> AVRTFARRRIDA <b>L</b> AD <b>V</b> APAD <b>G</b> PD <b>D</b> a <b>L</b> E <b>a</b> AAER <b>L</b> ATALSK                                                                                                                                                                                       | 132   |
| <i>Nostoc</i> sp.                     | 67  | HVYELSRQGRELHKS [4]                                                                     | HGDF <b>A</b> VSLLD <b>L</b> TA <b>E</b> T-WQDQFKTILQHQWQRKAQ <b>E</b> YRDRVGN <b>G</b> S-L <b>E</b> E-RVANLV <b>L</b> RKA                                                                                                                                                                                                        | 144   |
| <i>Cylindrospermopsis raciborskii</i> | 67  | HIYHLSFG <b>S</b> KEYL <b>Q</b> R <b>S</b> [7]                                          | YGEF <b>A</b> VSLLD <b>L</b> TA <b>E</b> T-WGTEQVKTILQHQWQRKAQ <b>E</b> YQEKV <b>G</b> Q <b>C</b> -L <b>E</b> E-RVATLV <b>L</b> RKA                                                                                                                                                                                               | 147   |
| <i>Microcystis</i> sp.                | 66  | HIYRLSRQGRGRFFHN                                                                        | YDN <b>F</b> A <b>V</b> SFLN <b>L</b> T <b>L</b> V <b>E</b> T-WG <b>E</b> Q <b>V</b> GE <b>L</b> L <b>K</b> HQWQRKA <b>E</b> YQ <b>L</b> R <b>L</b> GKGS-L <b>G</b> E-RMRK <b>L</b> L <b>E</b> IRQE                                                                                                                               | 139   |
| <i>Bacillus cereus</i>                | 64  | YL <b>V</b> GL <b>S</b> E <b>K</b> E <b>D</b> T <b>F</b> P <b>K</b> E                   | YK <b>F</b> A <b>I</b> DM <b>L</b> E <b>D</b> L <b>A</b> R <b>M</b> -G <b>D</b> E <b>K</b> IL <b>R</b> Y <b>V</b> L <b>K</b> E <b>R</b> T <b>K</b> R <b>M</b> E <b>B</b> Q <b>L</b> K <b>R</b> V <b>S</b> N <b>Q</b> K-N <b>L</b> A <b>g</b> K <b>V</b> Q <b>E</b> I <b>A</b> A <b>M</b> Q <b>E</b> K                             | 138   |
| <i>Streptomyces lividans</i>          | 80  | K <b>V</b> F <b>A</b> L <b>T</b> D <b>C</b> R <b>D</b> A <b>F</b> D <b>S</b>            | Y <b>D</b> K <b>L</b> A <b>A</b> D <b>A</b> L <b>R</b> W <b>I</b> A <b>E</b> Q <b>e</b> G <b>G</b> E <b>Q</b> A <b>I</b> A <b>A</b> F <b>A</b> R <b>A</b> R <b>I</b> A <b>A</b> Q <b>S</b> G <b>A</b> Y <b>R</b> A <b>A</b> V <b>S</b> V <b>P</b> -- <b>A</b> E <b>K</b> R <b>A</b> E <b>A</b> L <b>A</b> K <b>A</b> L <b>S</b> E | 154   |
| <i>Corynebacterium glutamicum</i>     | 80  | K <b>T</b> Y <b>R</b> L <b>T</b> D <b>K</b> R <b>S</b> I <b>F</b> G <b>H</b> E          | Y <b>D</b> S <b>L</b> A <b>A</b> A <b>A</b> L <b>A</b> T <b>L</b> R <b>E</b> V-G <b>D</b> D <b>A</b> V <b>R</b> Q <b>F</b> A <b>R</b> R <b>K</b> R <b>I</b> E <b>T</b> I <b>V</b> E <b>G</b> I <b>T</b> P <b>A</b> D <b>V</b> T <b>D</b> Q-S <b>I</b> E <b>t</b> A <b>K</b> S <b>L</b> V <b>E</b> A <b>F</b> S <b>R</b>           | 154   |
| <i>Serratia quinivorans</i>           | 60  | R <b>Y</b> W <b>S</b> L <b>T</b> Q <b>Q</b> G <b>H</b> A <b>Q</b> F <b>A</b> N <b>G</b> | H <b>D</b> R <b>L</b> A <b>T</b> E <b>L</b> L <b>G</b> S <b>A</b> H <b>Q</b> L-F <b>G</b> T <b>E</b> G <b>V</b> D <b>Q</b> L <b>L</b> S <b>A</b> R <b>E</b> D <b>K</b> L <b>Y</b> Q <b>R</b> Y <b>A</b> E <b>L</b> S <b>E</b> E <b>D</b> - <b>C</b> H <b>Q</b> - <b>K</b> L <b>A</b> R <b>L</b> V <b>R</b> L <b>R</b> Q <b>H</b>  | 134   |
| <i>Planktothrix agardhii</i>          | 154 | EGYMAEWYLL <b>E</b> SEF [6]                                                             | ERYILTEHHC <b>A</b> ISNV <b>A</b> ESF <b>P</b> SV <b>C</b> HE <b>L</b> EM <b>F</b> GE <b>L</b> -EDCTVERTHWIVNGEHRC <b>G</b> YL <b>I</b>                                                                                                                                                                                           | G 231 |
| <i>Mycobacterium fortuitum</i>        | 148 | AGYATT <b>N</b> FVD <b>G</b> P <b>I</b>                                                 | HGVQ <b>I</b> C <b>H</b> H <b>C</b> PSV <b>H</b> VA <b>E</b> EF <b>P</b> EL <b>C</b> ET <b>E</b> SE <b>A</b> FA <b>E</b> IL--G <b>T</b> H <b>Q</b> R <b>L</b> A <b>T</b> I <b>V</b> NG <b>D</b> CA <b>C</b> T <b>T</b> H <b>P</b> [ 9] <b>A</b>                                                                                   | 227   |
| <i>Synechococcus</i> sp.              | 140 | EGYVTELE <b>F</b> DPD <b>G</b> H                                                        | -GW <b>L</b> SE <b>F</b> H <b>C</b> SV <b>R</b> IA <b>E</b> E <b>P</b> V <b>V</b> CD <b>Q</b> EL <b>Q</b> L <b>R</b> H <b>T</b> F-P <b>D</b> C <b>V</b> ER <b>V</b> H <b>V</b> R <b>L</b> E <b>K</b> H <b>S</b> <b>G</b> C <b>F</b> R <b>I</b> T                                                                                  | P 210 |
| <i>Gloeotheca citriformis</i>         | 140 | EGYMAEL-L <b>L</b> ME <b>K</b> N [4]                                                    | Q <b>K</b> Y <b>I</b> L <b>A</b> E <b>H</b> N <b>C</b> A <b>I</b> SE <b>V</b> A <b>E</b> SY <b>P</b> SV <b>C</b> HE <b>L</b> EM <b>F</b> SA <b>V</b> L-P <b>D</b> C <b>I</b> I <b>E</b> R <b>T</b> H <b>W</b> I <b>N</b> NG <b>E</b> H <b>R</b> C <b>G</b> YL <b>I</b> Q                                                          | P 214 |
| <i>Rippkaea orientalis</i>            | 140 | EGYMAELHLVNR <b>K</b> N [6]                                                             | EGY <b>I</b> L <b>A</b> E <b>H</b> H <b>C</b> A <b>I</b> SN <b>V</b> A <b>E</b> SY <b>P</b> TV <b>C</b> D <b>H</b> EL <b>Q</b> M <b>F</b> A <b>A</b> IL-P <b>D</b> C <b>T</b> V <b>E</b> R <b>T</b> H <b>W</b> I <b>N</b> E <b>G</b> E <b>H</b> N <b>C</b> G <b>Y</b> L <b>I</b> Q                                                | K 217 |
| <i>Crocospaera subtropica</i>         | 140 | EGYMAELHRAN <b>E</b> K <b>N</b> [6]                                                     | EGY <b>L</b> L <b>A</b> E <b>H</b> H <b>C</b> A <b>I</b> SE <b>V</b> A <b>E</b> SY <b>P</b> TV <b>C</b> HE <b>L</b> EM <b>F</b> A <b>E</b> IL-P <b>D</b> C <b>M</b> I <b>E</b> R <b>T</b> H <b>W</b> I <b>N</b> E <b>G</b> E <b>H</b> N <b>C</b> G <b>Y</b> L <b>I</b> R                                                          | V 217 |
| <i>Mycobacterium tuberculosis</i>     | 133 | AGYVAT <b>T</b> TRV <b>G</b> G <b>P</b> I                                               | HGVQ <b>F</b> Q <b>H</b> H <b>C</b> PSV <b>H</b> VA <b>E</b> EF <b>P</b> EL <b>C</b> ET <b>E</b> Q <b>Q</b> A <b>M</b> A <b>E</b> V <b>L</b> --G <b>T</b> H <b>Q</b> R <b>L</b> A <b>T</b> I <b>V</b> NG <b>D</b> CA <b>C</b> T <b>T</b> H <b>P</b> [10] <b>A</b>                                                                 | 213   |
| <i>Nostoc</i> sp.                     | 145 | EGFMAEY <b>F</b> PVNS <b>P</b> H [4]                                                    | Q <b>R</b> F <b>I</b> F <b>M</b> E <b>H</b> N <b>C</b> A <b>I</b> SN <b>V</b> A <b>E</b> S <b>F</b> SV <b>C</b> HE <b>L</b> EM <b>F</b> A <b>A</b> V <b>L</b> -P <b>D</b> C <b>T</b> V <b>E</b> R <b>T</b> H <b>W</b> L <b>I</b> NG <b>E</b> H <b>R</b> C <b>G</b> YL <b>W</b> Q                                                  | A 220 |
| <i>Cylindrospermopsis raciborskii</i> | 148 | EGFMAE <b>F</b> RPVE <b>E</b> K <b>D</b> [6]                                            | H <b>G</b> F <b>L</b> F <b>M</b> E <b>H</b> N <b>C</b> A <b>I</b> SN <b>V</b> A <b>E</b> S <b>F</b> SV <b>C</b> HE <b>L</b> EM <b>F</b> A <b>A</b> IL-P <b>D</b> C <b>S</b> W <b>R</b> T <b>H</b> W <b>L</b> D <b>G</b> H <b>R</b> C <b>V</b> Y <b>L</b> I <b>K</b>                                                               | - 224 |
| <i>Microcystis</i> sp.                | 140 | EGYMAELVALE <b>A</b> E <b>N</b>                                                         | -SY <b>I</b> L <b>A</b> E <b>H</b> H <b>C</b> A <b>I</b> A <b>E</b> V <b>A</b> GS <b>Y</b> PS <b>I</b> C <b>H</b> E <b>L</b> EM <b>F</b> A <b>M</b> L <b>L</b> -P <b>D</b> C <b>T</b> I <b>E</b> R <b>T</b> H <b>W</b> I <b>N</b> Q <b>G</b> E <b>Q</b> R <b>C</b> G <b>Y</b> L <b>I</b> K                                        | C 210 |
| <i>Bacillus cereus</i>                | 139 | NGY <b>M</b> V <b>Q</b> I <b>K</b> R <b>D</b> E <b>K</b> S                              | --F <b>V</b> I <b>E</b> K <b>Q</b> N <b>C</b> L <b>K</b> E <b>I</b> A <b>E</b> R <b>F</b> P <b>Q</b> <b>C</b> E <b>D</b> E <b>K</b> E <b>M</b> Y <b>K</b> R <b>L</b> F-T <b>N</b> A <b>E</b> V <b>K</b> T <b>L</b> A <b>N</b> M <b>C</b> E <b>G</b> D <b>C</b> S <b>C</b> S <b>Y</b> Q <b>I</b> K                                 | E 208 |
| <i>Streptomyces lividans</i>          | 155 | D <b>G</b> Y <b>A</b> A <b>T</b> A <b>R</b> S <b>A</b> P <b>H</b> P <b>Q</b>            | Q <b>G</b> E <b>Q</b> L <b>Q</b> H <b>H</b> C <b>P</b> V <b>A</b> H <b>V</b> A <b>E</b> Q <b>F</b> P <b>Q</b> L <b>C</b> E <b>A</b> E <b>T</b> E <b>F</b> F <b>A</b> E <b>L</b> L--G <b>T</b> H <b>Q</b> R <b>L</b> A <b>T</b> I <b>A</b> H <b>G</b> D <b>G</b> W <b>C</b> T <b>T</b> F <b>I</b> P [11] <b>S</b>                  | 236   |
| <i>Corynebacterium glutamicum</i>     | 155 | H <b>G</b> Y <b>A</b> A <b>T</b> --V <b>D</b> A <b>T</b> R                              | N <b>G</b> L <b>Q</b> L <b>Q</b> H <b>H</b> C <b>P</b> I <b>S</b> T <b>V</b> A <b>T</b> E <b>F</b> P <b>E</b> L <b>C</b> E <b>A</b> E <b>H</b> Q <b>A</b> V <b>S</b> E <b>L</b> L--G <b>Q</b> H <b>T</b> Q <b>P</b> L <b>A</b> T <b>I</b> A <b>D</b> G <b>H</b> G <b>I</b> C <b>T</b> T <b>N</b> I <b>P</b> [ 6] <b>S</b>         | 228   |
| <i>Serratia quinivorans</i>           | 135 | D <b>G</b> Y <b>M</b> A <b>E</b> L--L <b>E</b> H <b>P</b> Q                             | -G <b>M</b> L <b>V</b> E <b>N</b> H <b>C</b> P <b>I</b> G <b>V</b> A <b>A</b> T <b>A</b> C <b>S</b> S <b>L</b> C <b>N</b> S <b>E</b> L <b>Q</b> L <b>F</b> N <b>R</b> L <b>F</b> <sub>g</sub> Q <b>Y</b> R <b>I</b> E <b>R</b> T <b>A</b> H <b>A</b> I <b>S</b> G <b>S</b> R <b>H</b> C <b>A</b> Y <b>L</b> I <b>R</b> [ 4]-      | 207   |

**Figure S8 Alignment of SufR proteins from bacteria.** Strictly conserved amino acids are shown in red.

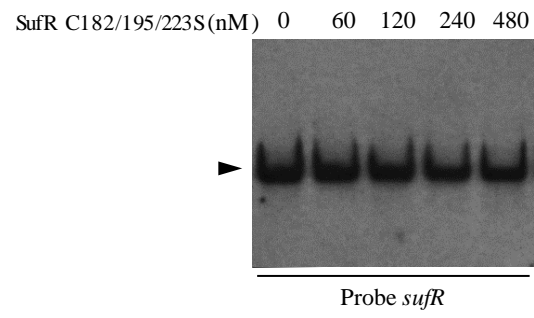

**Figure S9 Binding of SufR C182/195/223S to the *sufR* promoter region by EMSA.**

EMSA conditions as described for Figure 2. Arrow: free probe.

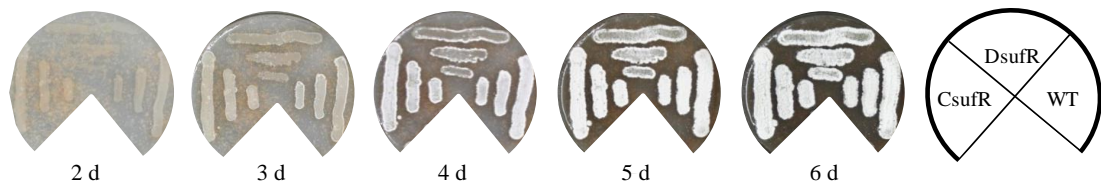

**Figure S10 Effects of *sufR* deletion on morphological differentiation.** WT, wild-type stain; DsufR, *sufR* deletion mutant; CsufR, *sufR* complement strain. The strains were grown on SFM agar.

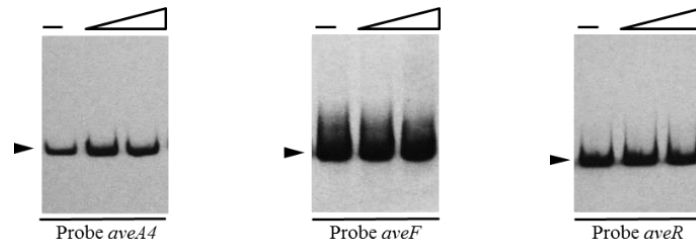

**Figure S11 Binding of SufR to promoter regions of *aveA4*, *aveF* and *aveR*.** The concentration of SufR: 60 nM and 120 nM. Arrow: free probe.

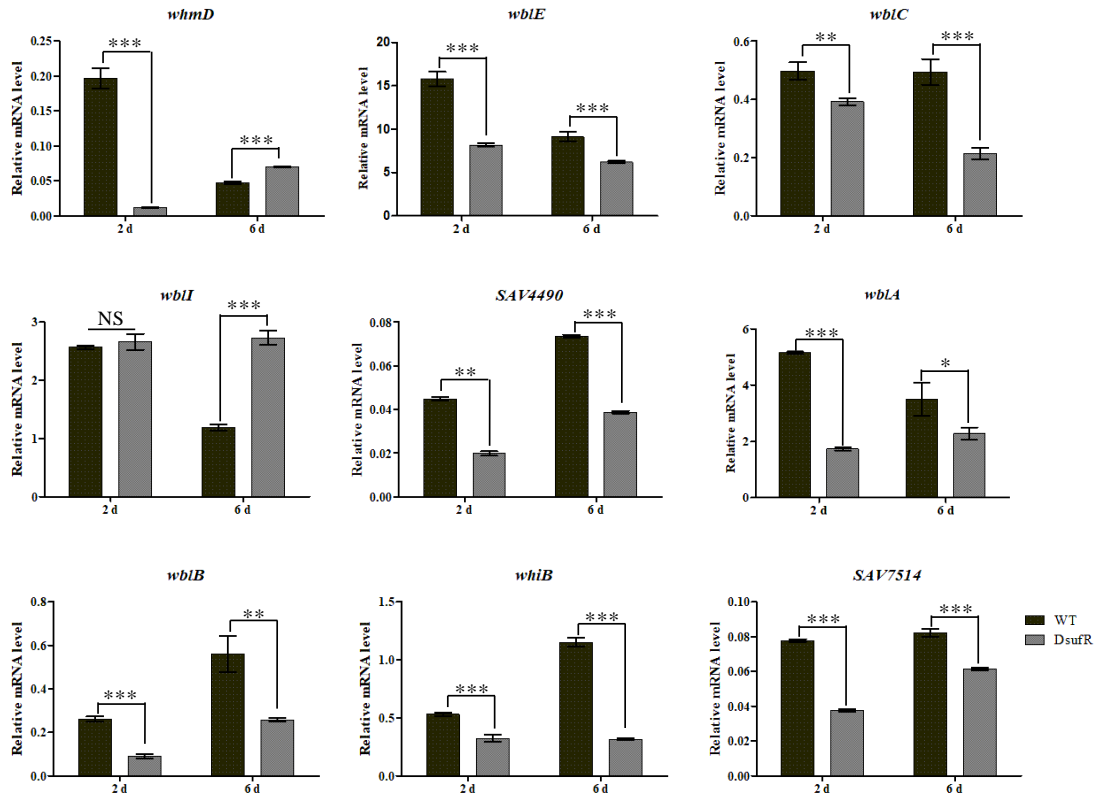

**Figure S12 RT-qPCR analysis of transcription of *whiB*-like genes in the WT and DsufR.**

RNAs were prepared from cells grown on SFM agar for 2 or 6 days. \*,  $P < 0.05$ ; \*\*,  $P < 0.01$ ; \*\*\*,  $P < 0.001$ ; NS, not significant. Error bars: standard deviation of three technical replicates.

**Table S1 Putative targets of SufR**

| <b>Gene Name</b>       | <b>Function</b>                                               | <b>SEP Score</b> | <b>Sequence</b> |
|------------------------|---------------------------------------------------------------|------------------|-----------------|
| <i>SAV5359</i>         | putative glycosyl transferase                                 | -7.56            | CAACTTTTTCGGTTG |
| <i>SAV5715</i>         | hypothetical protein                                          | -7.56            | CAACAAGCGAGTTG  |
| <i>pbp8 (SAV4583)</i>  | putative penicillin-binding protein,                          | -7.59            | CAACAAAAAAGTTG  |
| <i>wblA (SAV4584)</i>  | putative WhiB-family transcriptional regulator                | -7.59            | CAACAAAAAAGTTG  |
| <i>ssgB (SAV4604)</i>  | putative morphological differentiation-associated protein     | -7.61            | CAACCCAGTGGTTG  |
| <i>minD2 (SAV4605)</i> | putative septum site determining protein                      | -7.61            | CAACCCAGTGGTTG  |
| <i>SAV2174</i>         | hypothetical protein                                          | -7.64            | CAACTTGCCGGTTG  |
| <i>SAV2175</i>         | putative DNA-binding protein                                  | -7.64            | CAACTTGCCGGTTG  |
| <i>SAV6323</i>         | hypothetical protein                                          | -7.64            | CAACGCCATTGTTG  |
| <i>sufR (SAV6324)</i>  | putative ArsR-family transcriptional regulator                | -7.64            | CAACGCCATTGTTG  |
| <i>smc (SAV2658)</i>   | putative chromosome segregation protein                       | -7.84            | CAACCGCTAAGTTG  |
| <i>kdgK (SAV3280)</i>  | putative 2-oxo-3-deoxygluconate kinase                        | -7.92            | CAACGGTGCCGTTG  |
| <i>SAV3281</i>         | putative D-amino acid deaminase                               | -7.92            | CAACGGTGCCGTTG  |
| <i>SAV6620</i>         | putative integral membrane protein                            | -7.95            | CAACTGCCGGGTTG  |
| <i>SAV6621</i>         | hypothetical protein                                          | -7.95            | CAACTGCCGGGTTG  |
| <i>SAV5256</i>         | putative cellobiose ABC transporter substrate-binding protein | -8.03            | CAACCATGCAGTTG  |
| <i>SAV5257</i>         | putative LacI-family transcriptional regulator                | -8.03            | CAACCATGCAGTTG  |
| <i>SAV2213</i>         | putative secreted protein                                     | -8.04            | CAACCTTCCTGTTG  |
| <i>SAV4346</i>         | hypothetical protein                                          | -8.31            | CAACTCCGCGGTTG  |

**Table S2 Predicted WhiB-family proteins in *S. avermitilis***

| <b>Gene ID</b> | <b>Gene</b> | <b>Start</b> | <b>End</b> | <b>MW</b> | <b>Definition</b>                                                                      |
|----------------|-------------|--------------|------------|-----------|----------------------------------------------------------------------------------------|
| SAV1693        | <i>whmD</i> | 2072004      | 2071759    | 9150      | putative WhiB-family transcriptional regulator                                         |
| SAV3016        | <i>wblE</i> | 3771438      | 3771695    | 9671      | putative WhiB-family transcriptional regulator                                         |
| SAV3070        | <i>wblC</i> | 3832545      | 3832177    | 13190     | putative WhiB-family transcriptional regulator                                         |
| SAV3216        | <i>wblI</i> | 4007642      | 4007271    | 13658     | putative WhiB-family transcriptional regulator                                         |
| SAV4490        |             | 5487214      | 5485460    | 61647     | putative WhiB-family transcriptional regulator                                         |
| SAV4584        | <i>wblA</i> | 5599696      | 5600085    | 14257     | putative WhiB-family transcriptional regulator;<br>putative role in cell cycle control |
| SAV4997        | <i>wblB</i> | 6046508      | 6046179    | 11977     | putative WhiB-family transcriptional regulator;<br>putative role in cell cycle control |
| SAV5042        | <i>whiB</i> | 6104412      | 6104675    | 9892      | putative WhiB-family transcriptional regulator                                         |
| SAV7514        |             | 8958111      | 8957401    | 26526     | putative WhiB-family transcriptional regulator                                         |
